# Supplementary material
Source: PubMed Central journal article supplement (PMC6395314)
Supplement: 2018_192757-Disclosures_and_Contributions.pdf [file 2018_192757-Disclosures_and_Contributions.pdf]

Haematologica  
HAEMATOL/2018/192757  
Version 3

CD38 as a therapeutic target for adult acute myeloid leukemia and  
T-cell acute lymphoblastic leukemia

Jyoti Naik, Maria Themeli, Regina de Jong - Korlaar, Ruud W.J. Ruiter,  
Pino J. Poddighe, Huipin Yuan, Joost D. de Bruijn, Gert J.  
Ossenkoppele, Sonja Zweegman, Linda Smit, Tuna Mutis, Anton C.M.  
Martens, Niels W.C.J. van de Donk, and Richard W.J. Groen

Disclosures: RWJG, NWCJvdD, TM, GJO and SZ received research support from Janssen Pharmaceuticals. NWCJvdD, GJO and SZ received research support from Celgene. TM and GJO received research support from Novartis. NWCJvdD serves in advisory boards for Janssen Pharmaceuticals, Celgene, AMGEN, BMS, Novartis, Bayer and Servier; and received research support from AMGEN and BMS. TM received research support from Genmab and Onkimmune. GJO serves in advisory boards for Janssen Pharmaceuticals, Celgene, BMS, Novartis, Sunesis, Roche and Servier. SZ serves in in advisory boards for Janssen Pharmaceuticals, Celgene, Takeda, AMGEN and Sanofi; and received research support from Takeda.

Contributions: RWJG and ACMM provided conceptual design of experiments; JN, MT, RdJK and RWJR contributed to data acquisition; RdJK and RWJR performed mouse studies; HY, JDdB provided scaffold material; JN, MT, RdJK, RWJR, LS, ACMM and RWJG analyzed data; PJP, GJO, SZ and NWCJvdD provided clinical samples and data; JN, MT, ACMM and RWJG wrote the manuscript; and GJO, SZ, TM and NWCJvdD contributed to manuscript editing.
